# Supplementary material for: Perceptions, Knowledge, and Practices Concerning Indoor Environmental Pollution of Parents or Future Parents
Source: MDPI journal article supplement (doi:10.3390/ijerph17207669), 2020-10-21
Supplement: s1 [file s1]

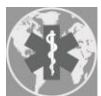

## Supplemental file :

### Document S1 : Questions exploring practices.

#### Air Renewal and combustion :

- 1) Do you allow people to smoke inside your home? (yes/no)  
If so, how often?
  - rarely or never
  - from time to time (less than once a week)
  - several times a week (one to 3 times a week)
  - 4 or more times a week
- 2) In winter, how often is your dwelling ventilated with windows open for more than 10 minutes?
  - rarely or never
  - from time to time (less than once a week)
  - several times a week (one to 3 times a week)
  - 4 or more times a week
- 3) In the summer, how often is your home ventilated with windows open for more than 10 minutes?
  - rarely or never
  - from time to time (less than once a week)
  - several times a week (one to 3 times a week)
  - 4 or more times a week
- 4) How often do you use scented candles in your home?
  - rarely or never
  - from time to time (less than once a week)
  - several times a week (one to 3 times a week)
  - 4 or more times a week
- 5) How often do you use incense in your home?
  - rarely or never
  - from time to time (less than once a week)
  - several times a week (one to 3 times a week)
  - 4 or more times a week
- 6) How often do you (yourself) use a deodorant spray in your toilet?
  - rarely or never
  - from time to time (less than once a week)
  - several times a week (one to 3 times a week)
  - 4 or more times a week
- 7) How is your home ventilated?
  - Functional controlled mechanical ventilation (CMV)
  - ducts, natural ventilation grids
  - no device or does not work
  - I don't know
- 8) Is the CMV in your home cleaned at least once a year? (yes/ no)

- 9) At what temperature do you heat your home on average? \_\_\_\_\_
- 10) Do you have your heating installations checked by a professional regularly (at least once a year)? (yes/ no)
- 11) Do you have a fireplace or stove? (yes/ no)  
If so, do you have them swept regularly (at least once a year)? (yes/ no)

**Hygiene and cosmetics:**

- 12) For your hygiene (body, hair and teeth), do you check the composition of the products you use? (yes/ no)  
If so, why? \_\_\_\_\_
- 13) Do you use a mobile application to choose these hygiene products? (yes/ no)
- 14) For your esthetics, among the cosmetics below, check those you use regularly (every day or almost every day, all year round)?
- foundation deodorant
  - moisturizing face cream powder
  - moisturizing body cream perfume
  - moisturizing hand cream shaving foam
  - aftershave lip balm
  - lipstick mascara
  - eye pencil gel or lacquer
  - other(s) (specify) : \_\_\_\_\_
- 15) Among the following products, check the ones you use and indicate their frequency:
- hair dyes: \_\_\_\_\_
  - nail polish : \_\_\_\_\_
  - face mask: \_\_\_\_\_
  - hair mask : \_\_\_\_\_

**Textile:**

- 16) Do you have your clothes cleaned regularly by a dry cleaner? (yes/ no)  
If so, how often? \_\_\_\_\_
- 17) Do you wash your textile before the first use?
- never or rarely
  - occasionally
  - regularly
- When you don't wash it, do you air it out?
- never or rarely
  - occasionally
  - regularly
- 18) Do you use a detergent:
- industrial?
  - with ecolabel?
  - homemade?
  - I don't know?
- 19) Do you use:

- Fabric softeners? (yes / no/ I don't know)
- Stain removers? (yes/ no/ I don't know)
- Bleach? (yes/ no/ I don't know)

**Housekeeping:**

20) Do you sometimes mix several cleaning products at the same time to clean your interior?

- never or rarely
- occasionally
- regularly
- I don't know

21) Do you use products containing bleach?

- Never
- once a month maximum
- once a week maximum
- more than once a week
- I don't know

22) On the packaging of cleaning products, read:

A. Precautions for use?

- never or rarely
- occasionally
- regularly

B. Pictograms?

- never or rarely
- occasionally
- regularly

23) Do you remove dust with wet cleaning (cloth soaked in water)?

- never or rarely
- occasionally
- regularly

**Furniture and decoration:**

24) In the last twelve months, have you acquired/purchased:

- new cloth armchairs or sofas?
- new treated wood furniture?
- Second-hand furniture?

25) When you buy new furniture, do you air:

- more often than usual when you smell?
- more often than usual even when there is no smell?
- as often as usual?
- less than usual?

**Do-it yourself and construction:**

26) If, for example, you were to repaint a child's room in your home yourself, what attitude would you adopt/adopt?

- I look at the composition of the paintings
- I look at the pictograms of the paintings
- I am wearing a mask
- I keep pregnant women away from this room.

- I forbid the access of this room to the children
- I air this room more often than usual during the work.
- I air this room more often than usual for several weeks after the work is completed.
- I aerate my house more often than usual during the work.

**Table S1.** Practice on air renewal according to socio-demographic characteristics (n=554).

|                                                  | Home ventilation in winter per week* |                                 |         | CMV cleaned at least once a year** |                  | Housing temperature above 22 degrees** |              |
|--------------------------------------------------|--------------------------------------|---------------------------------|---------|------------------------------------|------------------|----------------------------------------|--------------|
|                                                  | 1 to 3 times<br>OR [99 % CI]         | 4 or more times<br>OR [99 % CI] | p-value | OR [99 % CI]                       | p-value          | OR [99 % CI]                           | p-value      |
| <b>Age</b>                                       | 1.02 [0.98-1.07]                     | 1.04 [1.00-1.08]                | 0.028   | 1.00 [0.97-1.04]                   | 0.858            | 0.92 [0.85-0.99]                       | <b>0.004</b> |
| <b>Sex</b>                                       |                                      |                                 |         |                                    |                  |                                        |              |
| men                                              | 1                                    | 1                               | 0.408   | 1                                  | 0.083            | 1                                      | 0.633        |
| women                                            | 0.97 [0.47-2.00]                     | 1.6 [0.54-4.73]                 |         | 1.62 [0.78-3.36]                   |                  | 0.81 [0.24-2.69]                       |              |
| <b>Degree of urbanization of their residence</b> |                                      |                                 |         |                                    |                  |                                        |              |
| Rural area : < 2,000 people                      | 1                                    | 1                               | 0.892   | 1                                  | 0.253            | 1                                      | 0.452        |
| 2000 to 9999 people                              | 1.04 [0.35-4.24]                     | 0.8 [0.30-2.09]                 |         | 1.57 [0.81-3.02]                   |                  | 0.66 [0.16-2.74]                       |              |
| 10000 to 49999 people                            | 1.14 [0.32-4.11]                     | 1.08 [0.14-8.48]                |         | 1.22 [0.60-2.49]                   |                  | 0.39 [0.04-4.12]                       |              |
| ≥50,000 people : Rennes                          | 0.93 [0.3-2.91]                      | 1.00 [0.44-2.27]                |         | 1.52 [0.8-2.88]                    |                  | 1.16 [0.34-3.93]                       |              |
| <b>Living in a couple</b>                        |                                      |                                 |         |                                    |                  |                                        |              |
| no                                               | 1                                    | 1                               | 0.369   | 1                                  | 0.447            | 1                                      | 0.108        |
| yes                                              | 1.48 [0.71-3.11]                     | 1.14 [0.63-2.05]                |         | 1.2 [0.64-2.23]                    |                  | 0.50 [0.16-1.56]                       |              |
| <b>Education</b>                                 |                                      |                                 |         |                                    |                  |                                        |              |
| Less than a French secondary school diploma      | 1                                    | 1                               | 0.129   | 1                                  | <b>&lt;0.001</b> | 1                                      | 0.011        |
| French secondary school diploma                  | 0.95 [0.32-2.82]                     | 0.59 [0.24-1.49]                |         | 0.49 [0.22-1.11]                   |                  | 0.09 [0.01-0.72]                       |              |
| Two or three-year university level               | 0.64 [0.24-1.68]                     | 0.67 [0.24-1.83]                |         | 0.68 [0.28-1.66]                   |                  | 0.85 [0.22-3.25]                       |              |
| Master's level or more                           | 0.10 [0.36-2.76]                     | 0.49 [0.14-1.73]                |         | 0.20 [0.10-0.39]                   |                  | 0.30 [0.05-1.62]                       |              |
| <b>Having one or more children</b>               |                                      |                                 |         |                                    |                  |                                        |              |
| no                                               | 1                                    | 1                               | 0.069   | 1                                  | 0.094            | 1                                      | 0.169        |
| yes                                              | 1.59 [0.91-2.78]                     | 1.14 [0.66-1.96]                |         | 1.43 [0.82-2.49]                   |                  | 0.53 [0.16-1.79]                       |              |

|                         |                  |                  |       |                  |       |                  |       |
|-------------------------|------------------|------------------|-------|------------------|-------|------------------|-------|
| <b>Expecting a baby</b> |                  |                  |       |                  |       |                  |       |
| no                      | 1                | 1                | 0.779 | 1                | 0.085 | 1                | 0.814 |
| yes                     | 0.71 [0.21-2.51] | 0.76 [0.19-3.13] |       | 2.29 [0.65-8.06] |       | 1.16 [0.21-6.36] |       |

\*Reference: less than once a week, \*\*Reference: no.

**Table S2.** Practice on combustion appliances according to socio-demographic characteristics (n=554).

|                                                  | Allowed indoor smoking* |                  | Checked heating systems at least once a year* |              |
|--------------------------------------------------|-------------------------|------------------|-----------------------------------------------|--------------|
|                                                  | OR [99 % CI]            | p-value          | OR [99 % CI]                                  | p-value      |
| <b>Age</b>                                       | 0.95 [0.89-1.02]        | 0.071            | 1.06 [1-1.12]                                 | 0.016        |
| <b>Sex</b>                                       |                         |                  |                                               |              |
| men                                              | 1                       | 0.628            | 1                                             | 0.206        |
| women                                            | 0.88 [0.42-1.82]        |                  | 1.32 [0.74-2.36]                              |              |
| <b>Degree of urbanization of their residence</b> |                         |                  |                                               |              |
| Rural area : < 2,000 people                      | 1                       | 0.480            | 1                                             | 0.015        |
| 2000 to 9999 people                              | 1.46 [0.44-4.84]        |                  | 1.71 [0.71-4.12]                              |              |
| 10000 to 49999 people                            | 0.66 [0.1-4.4]          |                  | 3.01 [1.25-7.26]                              |              |
| ≥50,000 people : Rennes                          | 1.61 [0.49-5.33]        |                  | 1.65 [0.68-4.00]                              |              |
| <b>Living in a couple</b>                        |                         |                  |                                               |              |
| no                                               | 1                       | <b>&lt;0.001</b> | 1                                             | <b>0.006</b> |
| yes                                              | 0.26 [0.12-0.56]        |                  | 1.75 [1.05-2.94]                              |              |
| <b>Education</b>                                 |                         |                  |                                               |              |
| Less than a French secondary school diploma      | 1                       | 0.162            | 1                                             | 0.100        |
| French secondary school diploma                  | 0.48 [0.15-1.55]        |                  | 0.84 [0.4-1.78]                               |              |
| Two or three-year university level               | 1 [0.32-3.15]           |                  | 0.45 [0.16-1.25]                              |              |
| Master's level or more                           | 0.61 [0.17-2.23]        |                  | 0.92 [0.38-2.26]                              |              |
| <b>Having one or more children</b>               |                         |                  |                                               |              |

|                         |                  |        |                 |        |
|-------------------------|------------------|--------|-----------------|--------|
| no                      | 1                | <0.001 | 1               | <0.001 |
| yes                     | 0.25 [0.1-0.67]  |        | 2.9 [1.65-5.09] |        |
| <b>Expecting a baby</b> |                  |        |                 |        |
| no                      | 1                | 0.405  | 1               | 0.119  |
| yes                     | 0.64 [0.16-2.64] |        | 1.9 [0.64-5.59] |        |

\*Reference: no.

**Table S3.** Hygiene products and cosmetics use according to socio-demographic characteristics (n=554).

|                                                  | Check the composition of hygiene products* |         | Use an application to choose hygiene or cosmetic products* |         | Use five or more products daily* |         |
|--------------------------------------------------|--------------------------------------------|---------|------------------------------------------------------------|---------|----------------------------------|---------|
|                                                  | OR [99% CI]                                | p-value | OR [99% CI]                                                | p-value | OR [99% CI]                      | p-value |
| <b>Age</b>                                       | 1.00 [0.95-1.04]                           | 0.79    | 0.98 [0.93-1.04]                                           | 0.38    | 0.96 [0.92-1.00]                 | 0.012   |
| <b>Sex</b>                                       |                                            |         |                                                            |         |                                  |         |
| men                                              | 1                                          | 0.039   | 1                                                          | 0.293   | 1                                | <0.001  |
| women                                            | 1.85 [0.85-4.01]                           |         | 1.57 [0.50-4.90]                                           |         | 8.30 [3.75-18.34]                |         |
| <b>Degree of urbanization of their residence</b> |                                            |         |                                                            |         |                                  |         |
| Rural area : < 2,000 people                      | 1                                          | 0.187   | 1                                                          | 0.241   | 1                                | 0.579   |
| 2000 to 9999 people                              | 0.72 [0.34-1.53]                           |         | 0.33 [0.05-2.07]                                           |         | 0.68 [0.33-1.40]                 |         |
| 10000 to 49999 people                            | 0.77 [0.38-1.56]                           |         | 0.22 [0.01-5.33]                                           |         | 0.90 [0.47-1.75]                 |         |
| ≥50,000 people : Rennes                          | 1.21 [0.61-2.40]                           |         | 0.56 [0.21-1.49]                                           |         | 0.90 [0.52-1.56]                 |         |
| <b>Living in a couple</b>                        |                                            |         |                                                            |         |                                  |         |
| no                                               | 1                                          | 0.838   | 1                                                          | 0.323   | 1                                | 0.055   |
| yes                                              | 0.95 [0.48-1.87]                           |         | 1.32 [0.63-2.80]                                           |         | 0.68 [0.40-1.15]                 |         |
| <b>Education</b>                                 |                                            |         |                                                            |         |                                  |         |
| Less than a French secondary school diploma      | 1                                          | 0.016   | 1                                                          | 0.002   | 1                                | 0.029   |
| French secondary school diploma                  | 0.95 [0.43-2.12]                           |         | 1.61 [0.52-4.96]                                           |         | 1.75 [0.74-4.14]                 |         |

|                                    |                  |       |                  |       |                  |       |
|------------------------------------|------------------|-------|------------------|-------|------------------|-------|
| Two or three-year university level | 1.79 [0.80-4.03] |       | 1.82 [0.44-7.46] |       | 1.36 [0.65-2.82] |       |
| Master's level or more             | 2.67 [0.94-7.54] |       | 3.71 [1.56-8.82] |       | 0.71 [0.34-1.47] |       |
| <b>Having one or more children</b> |                  |       |                  |       |                  |       |
| no                                 | 1                | 0.234 | 1                | 0.548 | 1                | 0.06  |
| yes                                | 0.80 [0.49-1.32] |       | 1.18 [0.57-2.43] |       | 0.66 [0.36-1.18] |       |
| <b>Expecting a baby</b>            |                  |       |                  |       |                  |       |
| no                                 | 1                | 0.884 | 1                | 0.586 | 1                | 0.994 |
| yes                                | 1.06 [0.35-3.20] |       | 0.78 [0.23-2.66] |       | 1.00 [0.46-2.18] |       |

\*Reference: no.

**Table S4.** Practices on textile according to socio-demographic characteristics (n=554).

|                                                  | Wash textiles before first use* |              | Wash textiles with homemade or Eco-label laundry* |                   |
|--------------------------------------------------|---------------------------------|--------------|---------------------------------------------------|-------------------|
|                                                  | OR [99 % CI]                    | p-value      | OR [99 % CI]                                      | p-value           |
| <b>Age</b>                                       | 1.03 [0.99-1.07]                | 0.038        | 1.03 [0.98-1.08]                                  | 0.156             |
| <b>Sex</b>                                       |                                 |              |                                                   |                   |
| men                                              | 1                               | 0.019        | 1                                                 | 0.439             |
| women                                            | 1.50 [0.96-2.34]                |              | 0.83 [0.43-1.59]                                  |                   |
| <b>Degree of urbanization of their residence</b> |                                 |              |                                                   |                   |
| Rural area : < 2,000 people                      | 1                               | 0.131        | 1                                                 | 0.298             |
| 2000 to 9999 people                              | 0.74 [0.33-1.68]                |              | 0.96 [0.49-1.89]                                  |                   |
| 10000 to 49999 people                            | 0.68 [0.22-2.13]                |              | 0.66 [0.35-1.26]                                  |                   |
| ≥50,000 people : Rennes                          | 0.51 [0.24-1.10]                |              | 0.82 [0.37-1.79]                                  |                   |
| <b>Living in a couple</b>                        |                                 |              |                                                   |                   |
| no                                               | 1                               | <b>0.008</b> | 1                                                 | 0.196             |
| yes                                              | 1.66 [1.01-2.71]                |              | 1.43 [0.69-2.97]                                  |                   |
| <b>Education</b>                                 |                                 |              |                                                   |                   |
| Less than a French secondary school diploma      | 1                               | 0.210        | 1                                                 | <b>&lt; 0.001</b> |



|                                    |                  |       |                   |       |
|------------------------------------|------------------|-------|-------------------|-------|
| French secondary school diploma    | 1.03 [0.54-1.98] |       | 3.36 [1.56-7.26]  |       |
| Two or three-year university level | 0.77 [0.33-1.81] |       | 1.10 [0.35-3.49]  |       |
| Master's level or more             | 0.64 [0.33-1.26] |       | 5.57 [1.47-21.12] |       |
| <b>Having one or more children</b> |                  |       |                   |       |
| no                                 | 1                | 0.072 | 1                 | 0.437 |
| yes                                | 1.68 [0.79-3.56] |       | 1.18 [0.68-2.05]  |       |
| <b>Expecting a baby</b>            |                  |       |                   |       |
| no                                 | 1                | 0.968 | 1                 | 0.658 |
| yes                                | 0.98 [0.33-2.89] |       | 0.83 [0.27-2.54]  |       |

\*Reference: no.

**Table S5.** Use and choice of cleaning products (n=554).

|                                                  | Read precautions for use of cleaning products* |                          |              | Mixed cleaning products*    |                          |                  |
|--------------------------------------------------|------------------------------------------------|--------------------------|--------------|-----------------------------|--------------------------|------------------|
|                                                  | occasionally<br>OR [99% CI]                    | regularly<br>OR [99% CI] | p-value      | occasionally<br>OR [99% CI] | regularly<br>OR [99% CI] | p-value          |
| <b>Age</b>                                       | 1.03 [0.99-1.07]                               | 1.03 [0.99-1.07]         | 0.085        | 0.97 [0.9-1.03]             | 0.94 [0.89-0.98]         | <b>0.003</b>     |
| <b>Sex</b>                                       |                                                |                          |              |                             |                          |                  |
| men                                              | 1                                              | 1                        | 0.030        | 1                           | 1                        | 0.879            |
| women                                            | 0.93 [0.51-1.71]                               | 1.98 [0.76-5.15]         |              | 1.06 [0.4-2.86]             | 1.24 [0.36-4.25]         |                  |
| <b>Degree of urbanization of their residence</b> |                                                |                          |              |                             |                          |                  |
| Rural area : < 2,000 people                      | 1                                              | 1                        | <b>0.009</b> | 1                           | 1                        | 0.540            |
| 2000 to 9999 people                              | 0.96 [0.36-2.55]                               | 0.68 [0.28-1.64]         |              | 1.07 [0.45-2.54]            | 0.93 [0.23-3.78]         |                  |
| 10000 to 49999 people                            | 1.56 [0.43-5.75]                               | 0.74 [0.09-6.49]         |              | 1.26 [0.32-4.9]             | 0.75 [0.15-3.65]         |                  |
| ≥50,000 people : Rennes                          | 0.45 [0.17-1.17]                               | 0.80 [0.40-1.59]         |              | 2.13 [0.72-6.30]            | 1.15 [0.38-3.55]         |                  |
| <b>Living in a couple</b>                        |                                                |                          |              |                             |                          |                  |
| no                                               | 1                                              | 1                        | 0.585        | 1                           | 1                        | <b>&lt;0.001</b> |

|                                             |                  |                  |       |                  |                  |       |
|---------------------------------------------|------------------|------------------|-------|------------------|------------------|-------|
| yes                                         | 1.19 [0.56-2.55] | 0.91 [0.41-1.99] |       | 0.50 [0.23-1.10] | 0.40 [0.16-1.01] |       |
| <b>Education</b>                            |                  |                  |       |                  |                  |       |
| Less than a French secondary school diploma | 1                | 1                | 0.239 | 1                | 1                | 0.105 |
| French secondary school diploma             | 0.83 [0.40-1.72] | 1.00 [0.55-1.81] |       | 1.14 [0.44-2.97] | 0.29 [0.07-1.17] |       |
| Two or three-year university level          | 0.70 [0.38-1.27] | 1.02 [0.33-3.18] |       | 1.50 [0.40-5.69] | 0.74 [0.24-2.24] |       |
| Master's level or more                      | 0.97 [0.39-2.44] | 0.85 [0.24-2.94] |       | 0.63 [0.22-1.87] | 0.17 [0.02-1.26] |       |
| <b>Having one or more children</b>          |                  |                  |       |                  |                  |       |
| no                                          | 1                | 1                | 0.638 | 1                | 1                | 0.342 |
| yes                                         | 1.15 [0.67-2.00] | 1.23 [0.66-2.28] |       | 0.68 [0.34-1.36] | 1.14 [0.40-3.28] |       |
| <b>Expecting a baby</b>                     |                  |                  |       |                  |                  |       |
| no                                          | 1                | 1                | 0.673 | 1                | 1                | 0.518 |
| yes                                         | 1.23 [0.66-2.28] | 0.73 [0.22-2.42] |       | 0.72 [0.25-2.09] | 0.46 [0.06-3.44] |       |

\*Reference: Never or rarely.

**Table S6.** Attitude during renovation in a children room according to socio-demographic characteristics (n=554).

|                                                  | Aerate more often during/after work* |                  | Look at the composition of the products used for work* |              | Keep pregnant women away from the work room* |                  | Prohibit access to the work room to children* |                  |
|--------------------------------------------------|--------------------------------------|------------------|--------------------------------------------------------|--------------|----------------------------------------------|------------------|-----------------------------------------------|------------------|
|                                                  | OR [99% CI]                          | p-value          | OR [99% CI]                                            | P-value      | OR [99% CI]                                  | p-value          | OR [99% CI]                                   | p-value          |
| <b>Age</b>                                       | 0.96 [0.85-1.07]                     | <b>&lt;0.001</b> | 0.96 [0.93-0.997]                                      | <b>0.002</b> | 0.94 [0.90-0.97]                             | <b>&lt;0.001</b> | 0.96 [0.92-0.99]                              | <b>&lt;0.001</b> |
| <b>Sex</b>                                       |                                      |                  |                                                        |              |                                              |                  |                                               |                  |
| men                                              | 1                                    | 0.376            | 1                                                      | 0.191        | 1                                            | 0.493            | 1                                             | 0.139            |
| women                                            | 2.03 [0.24-16.94]                    |                  | 1.44 [0.69-3.04]                                       |              | 0.86 [0.48-1.54]                             |                  | 1.52 [0.72-3.23]                              |                  |
| <b>Degree of urbanization of their residence</b> |                                      |                  |                                                        |              |                                              |                  |                                               |                  |
| Rural area : < 2,000 people                      | 1                                    | 0.420            | 1                                                      | 0.940        | 1                                            | 0.673            | 1                                             | 0.981            |
| 2000 to 9999 people                              | 0.15 [0.01-3.85]                     |                  | 0.96 [0.44-2.10]                                       |              | 1.02 [0.42-2.48]                             |                  | 0.88 [0.34-2.27]                              |                  |
| 10000 to 49999 people                            | 0.33 [0.01-20.46]                    |                  | 0.85 [0.37-1.94]                                       |              | 1.46 [0.50-4.28]                             |                  | 0.97 [0.32-2.98]                              |                  |
| ≥50,000 people : Rennes                          | 0.16 [0.01-3.55]                     |                  | 0.89 [0.38-2.07]                                       |              | 0.92 [0.37-2.25]                             |                  | 0.93 [0.38-2.27]                              |                  |

**Living in a couple**

|     |                   |       |                  |       |                  |       |                  |       |
|-----|-------------------|-------|------------------|-------|------------------|-------|------------------|-------|
| no  | 1                 | 0.098 | 1                | 0.716 | 1                | 0.029 | 1                | 0.056 |
| yes | 3.66 [0.47-28.79] |       | 1.08 [0.61-1.91] |       | 0.62 [0.35-1.10] |       | 0.58 [0.28-1.22] |       |

**Education**

|                                             |                   |       |                  |       |                  |       |                  |       |
|---------------------------------------------|-------------------|-------|------------------|-------|------------------|-------|------------------|-------|
| Less than a French secondary school diploma | 1                 | 0.277 | 1                | 0.249 | 1                | 0.793 | 1                | 0.405 |
| French secondary school diploma             | 0.59 [0.06-6.39]  |       | 0.94 [0.41-2.14] |       | 1.18 [0.61-2.27] |       | 1.12 [0.37-3.39] |       |
| Two or three-year university level          | 5.97 [0.24-149.7] |       | 1.57 [0.59-4.18] |       | 1.07 [0.54-2.09] |       | 0.91 [0.32-2.58] |       |
| Master's level or more                      | 1.46 [0.11-19.75] |       | 1.35 [0.39-4.66] |       | 0.93 [0.44-1.96] |       | 0.63 [0.25-1.60] |       |

**Having one or more children**

|     |                   |       |                  |       |                 |              |                  |       |
|-----|-------------------|-------|------------------|-------|-----------------|--------------|------------------|-------|
| no  | 1                 | 0.553 | 1                | 0.086 | 1               | <b>0.001</b> | 1                | 0.201 |
| yes | 1.61 [0.19-13.51] |       | 0.59 [0.27-1.32] |       | 0.4 [0.21-0.78] |              | 0.70 [0.34-1.46] |       |

**Expecting a baby**

|     |                  |       |                  |       |                  |       |                  |       |
|-----|------------------|-------|------------------|-------|------------------|-------|------------------|-------|
| no  | 1                | 0.451 | 1                | 0.461 | 1                | 0.601 | 1                | 0.249 |
| yes | 0.49 [0.04-5.96] |       | 1.38 [0.43-4.41] |       | 1.18 [0.52-2.68] |       | 0.60 [0.19-1.93] |       |

\*Reference: no.

**Table S7.:** Practice on indoor air according to perceptions (n=554).

|                                                           | Home ventilation in winter per week* |                  |         | CMV cleaned at least once a year** |         | Housing temperature above 22 degrees** |         | Allowed indoor smoking** |         | Checked heating systems at least once a year** |         |
|-----------------------------------------------------------|--------------------------------------|------------------|---------|------------------------------------|---------|----------------------------------------|---------|--------------------------|---------|------------------------------------------------|---------|
|                                                           | 1 to 3 times                         | 4 or more times  |         |                                    |         |                                        |         |                          |         |                                                |         |
|                                                           | OR [99 % CI]                         | OR [99 % CI]     | P-value | OR [99 % CI]                       | P-value | OR [99 % CI]                           | P-value | OR [99 % CI]             | P-value | OR [99 % CI]                                   | P-value |
| <b>Have ever heard of indoor pollution</b>                |                                      |                  |         |                                    |         |                                        |         |                          |         |                                                |         |
| No                                                        | 1                                    | 1                | 0.079   | 1                                  | 0.739   | 1                                      | 0.617   | 1                        | 0.784   | 1                                              | 0.064   |
| Yes                                                       | 1.04 [0.62-1.75]                     | 1.64 [0.89-3.03] |         | 0.90 [0.40-2.03]                   |         | 0.78 [0.21-2.94]                       |         | 1.09 [0.47-2.57]         |         | 1.44 [0.86-2.40]                               |         |
| <b>Perceived level of health risk of indoor chemicals</b> |                                      |                  |         |                                    |         |                                        |         |                          |         |                                                |         |
| ≤4                                                        | 1                                    | 1                | 0.532   | 1                                  | 0.605   | 1                                      | 0.058   | 1                        | 0.382   | 1                                              | 0.309   |
| ≥5                                                        | 1.45 [0.59-3.57]                     | 1.40 [0.55-3.55] |         | 1.21 [0.46-3.19]                   |         | 0.44 [0.14-1.37]                       |         | 0.70 [0.24-2.08]         |         | 0.75 [0.36-1.58]                               |         |

| Ubiquity of environmental chemicals                  |                  |                  |       |                  |       |                  |       |                  |       |                  |       |
|------------------------------------------------------|------------------|------------------|-------|------------------|-------|------------------|-------|------------------|-------|------------------|-------|
| Disagree/mostly disagree                             | 1                | 1                | 0.335 | 1                | 0.651 | 1                | 0.866 | 1                | 0.371 | 1                | 0.321 |
| Agree                                                | 0.55 [0.25-1.18] | 0.55 [0.19-1.6]  |       | 1.27 [0.63-2.53] |       | 1.38 [0.27-6.97] |       | 1.81 [0.50-6.57] |       | 1.11 [0.55-2.24] |       |
| Completely agree                                     | 0.67 [0.22-2.07] | 0.53 [0.20-1.40] |       | 1.18 [0.53-2.62] |       | 1.19 [0.20-7.03] |       | 1.38 [0.35-5.42] |       | 1.43 [0.72-2.86] |       |
| Perceived health risk for French of indoor pollution |                  |                  |       |                  |       |                  |       |                  |       |                  |       |
| Low or medium                                        | 1                | 1                | 0.312 | 1                | 0.311 | 1                | 0.996 | 1                | 0.907 | 1                | 0.605 |
| High or very high                                    | 1.37 [0.72-2.61] | 1.34 [0.71-2.56] |       | 1.22 [0.72-2.06] |       | 1.00 [0.29-3.45] |       | 0.96 [0.42-2.23] |       | 1.14 [0.59-2.18] |       |

\*Reference: less than once a week, \*\*Reference: no.

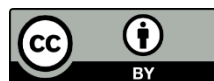

© 2019 by the authors. Licensee MDPI, Basel, Switzerland. This article is an open access article distributed under the terms and conditions of the Creative Commons Attribution (CC BY) license (<http://creativecommons.org/licenses/by/4.0/>).
